# Supplementary material for: Fat–Fit Patterns, Drug Consumption, and Polypharmacy in Older Adults: The EXERNET Multi-Center Study
Source: MDPI journal article supplement (doi:10.3390/nu13082872), 2021-08-21

**Electronic Supplementary Material 1. Distribution of age, sex, taking medication (polypharmacy), BMI and fat percentage in the Fat-Fit patterns**

**Figure S1.** Distribution of age in the four Fat-Fit patterns

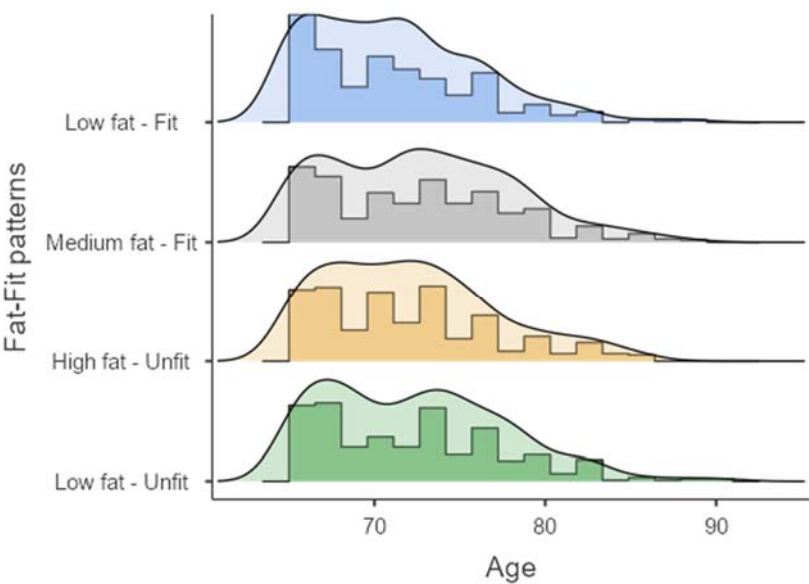

**Figure S2.** Distribution of sex in the four Fat-Fit patterns.

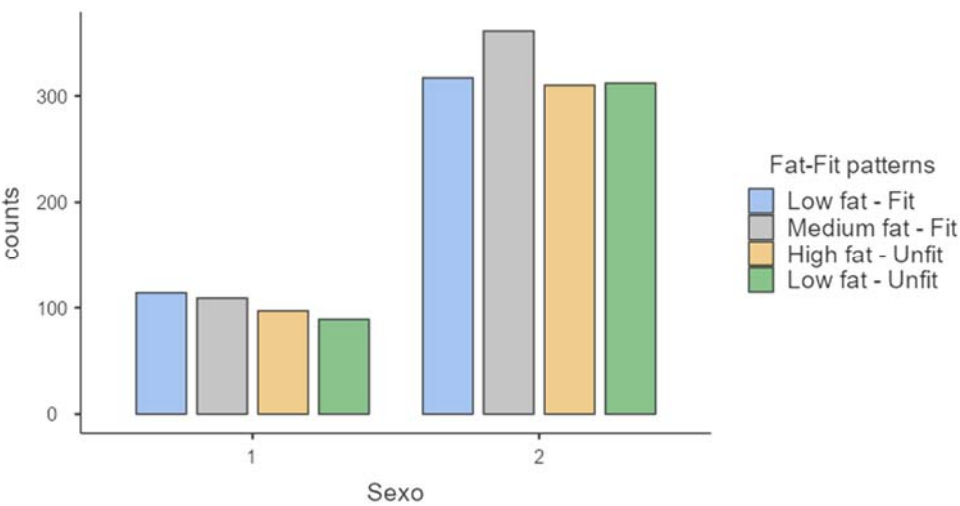

**Figure S3.** Distribution of fat percentage in the four Fat-Fit patterns.

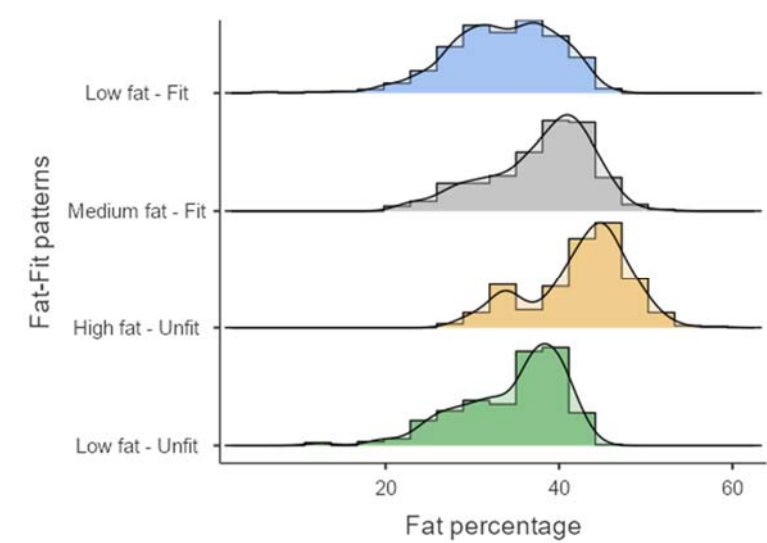

**Figure S4.** Distribution of BMI in the four Fat-Fit patterns.

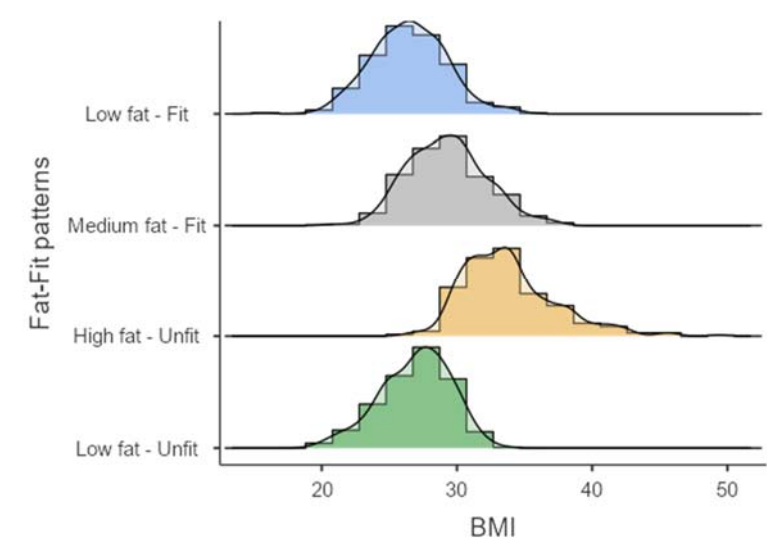

Supplement: s1 [file s1]
